# Supplementary material
Source: PubMed Central journal article supplement (PMC6858563)

**Fig. 1f**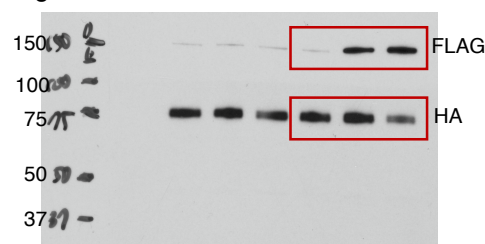

Membrane was cut through 100 kD. FLAG/HA blotting were from the same loading.

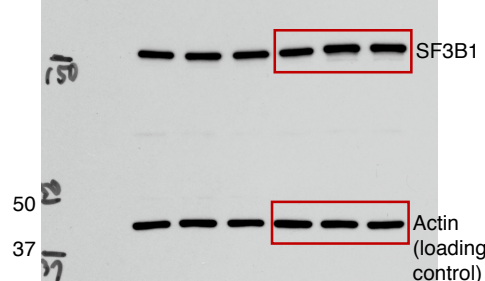

Membrane was cut through 75 kD. SF3B1/Actin blotting were from the same loading.

**Fig. 2b and 2c**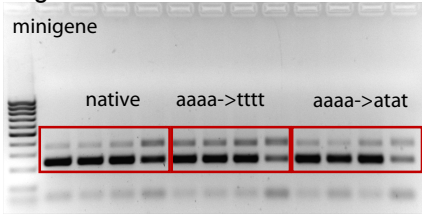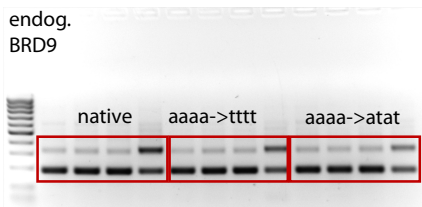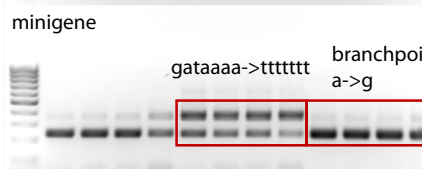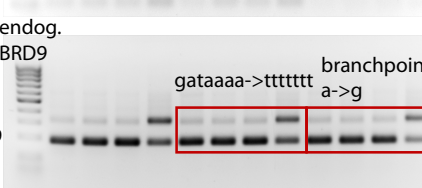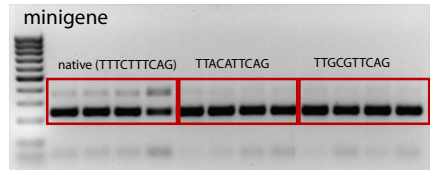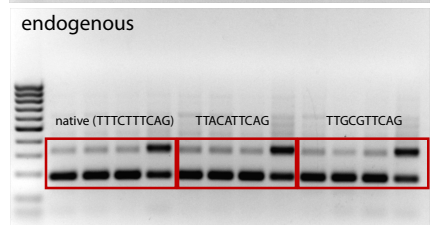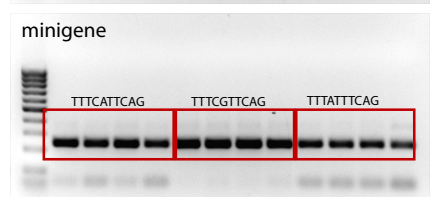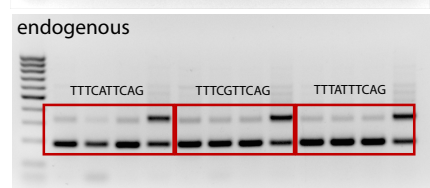**Fig. 2d**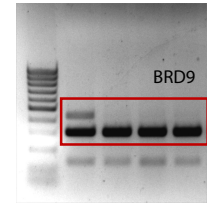**Fig. 2d**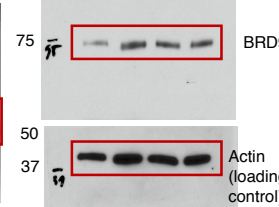

Membrane was cut through 50 kD.

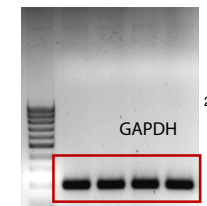**Fig. 3c**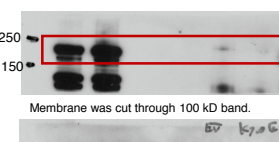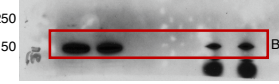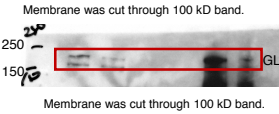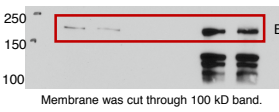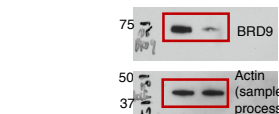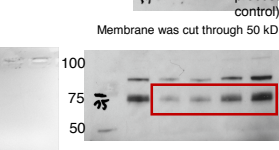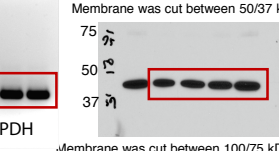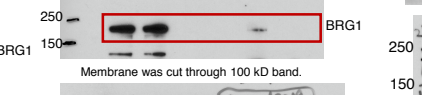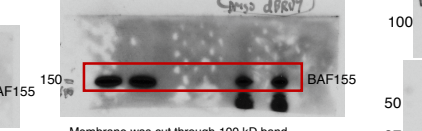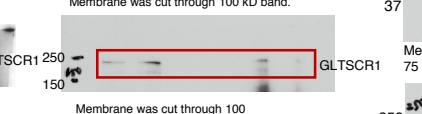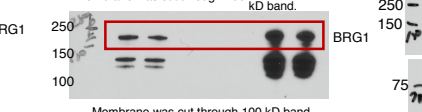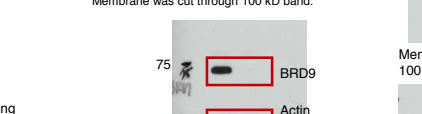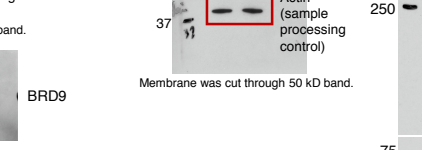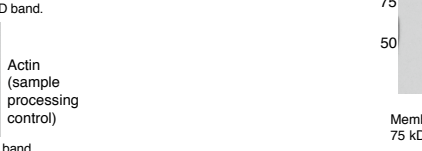**Fig. 3b**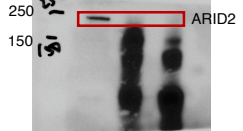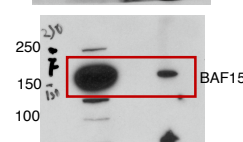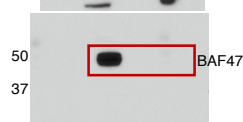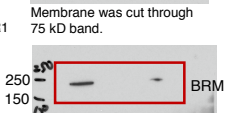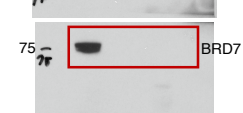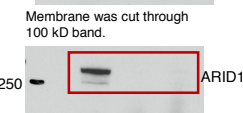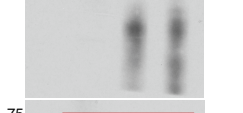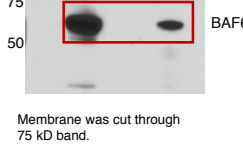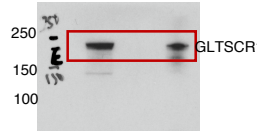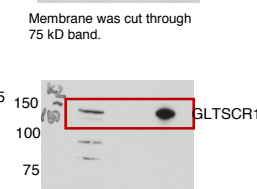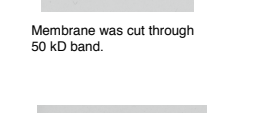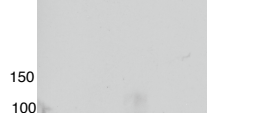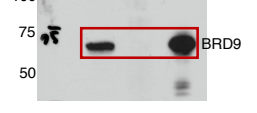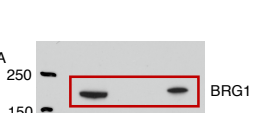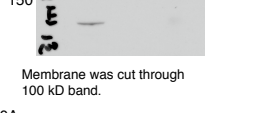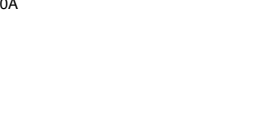**Fig. 4h**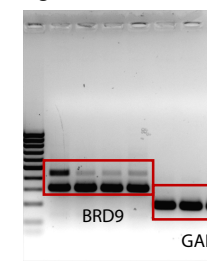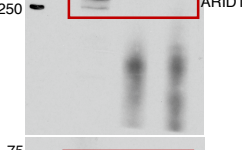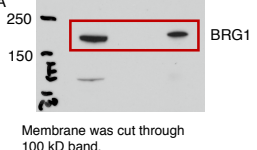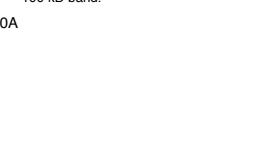

Extended Fig. 1i

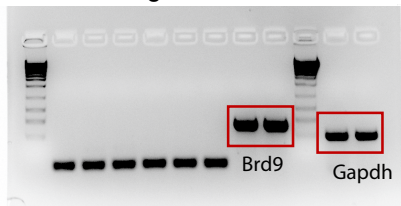

Extended Fig. 1j

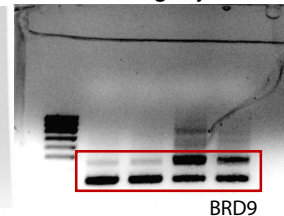

Extended Fig. 1k

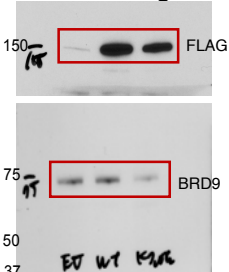

Extended Fig. 1l

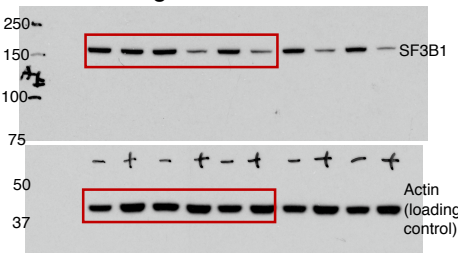

Extended Fig. 1m

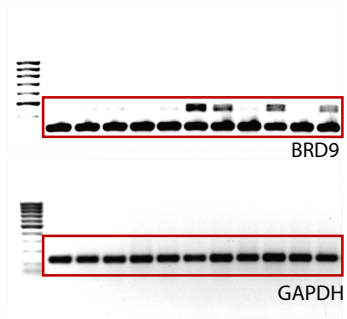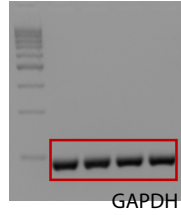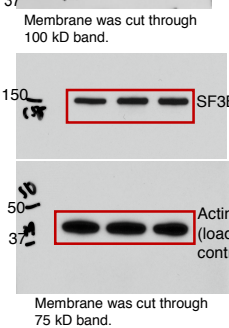

Extended Fig. 1n

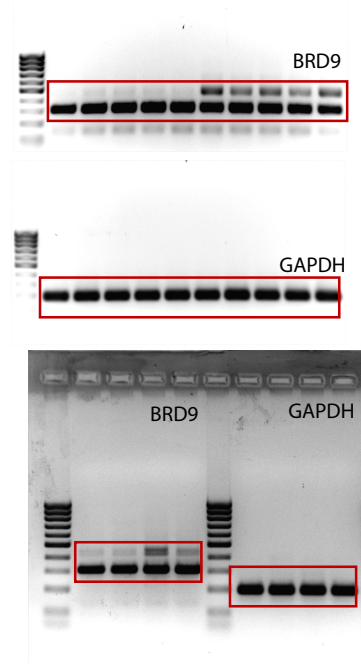

Extended Fig. 1n

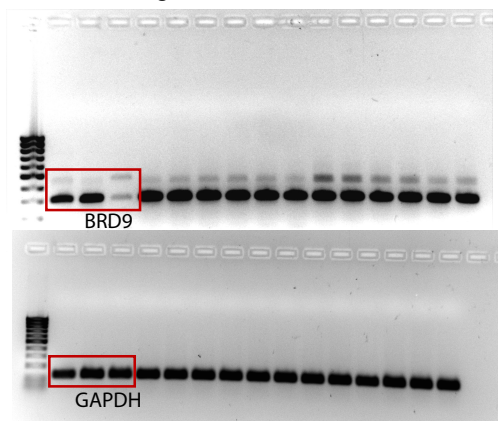

Extended Fig. 1q

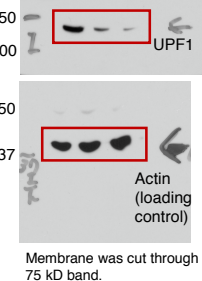

Extended Fig. 1t

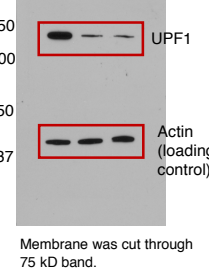

Extended Fig. 1w

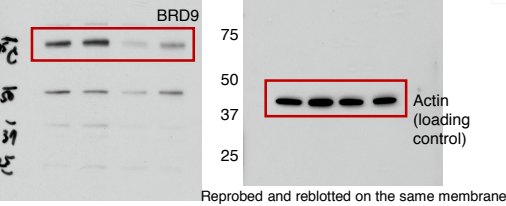

Extended Fig. 2c

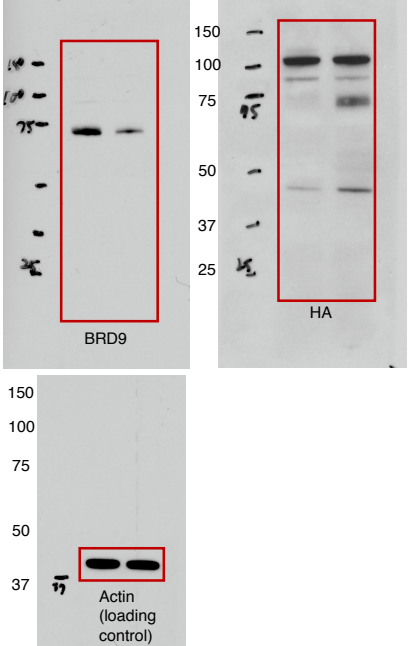

Extended Fig. 2d

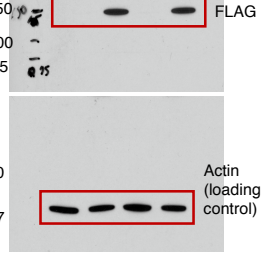

Extended Fig. 2h

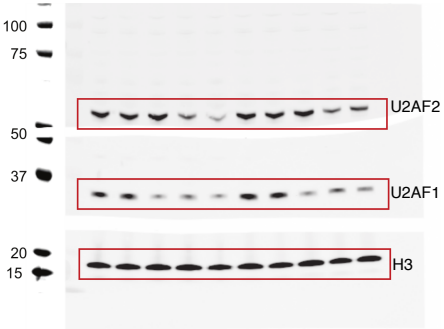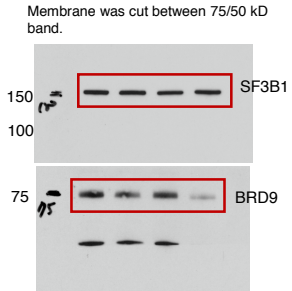

Membrane was cut through 50 kU band and between 37/20kDa band. H3 is loading control. The ladder came from a different infrared channel.

Membrane was cut between 100/75 kD band.

Reprobed and reblotted on the same membrane.

Reprobed and reblotted on the same membrane.



Extended Fig. 2g, 2j and 2k

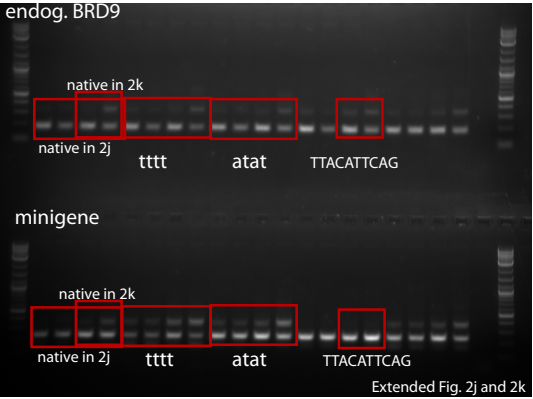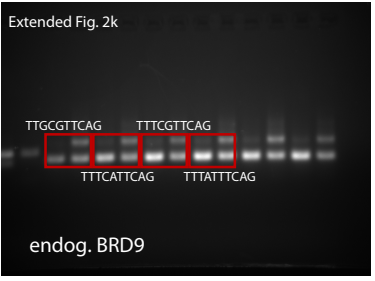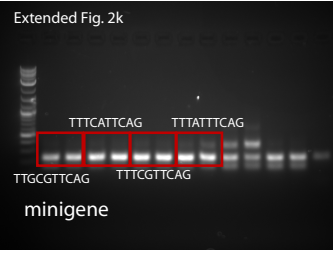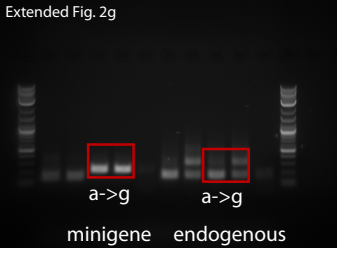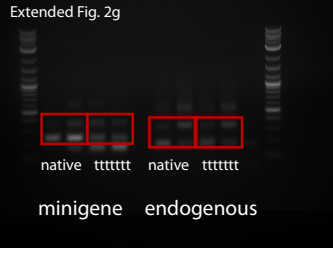

Extended Fig. 2m and 2n

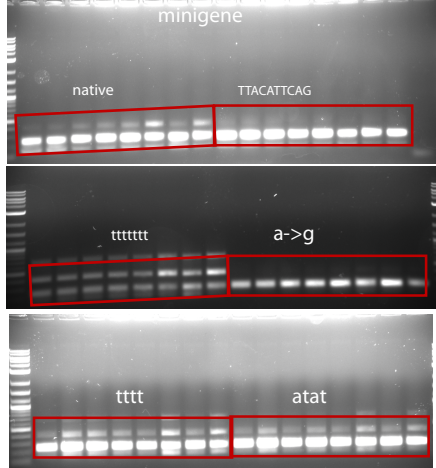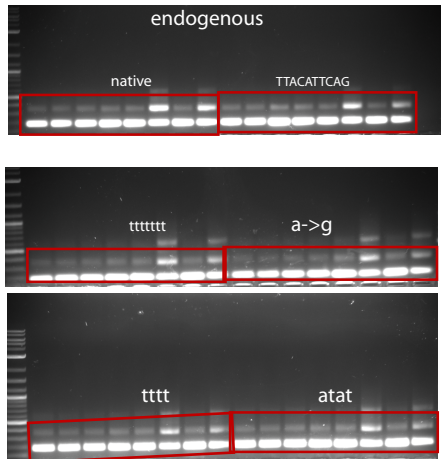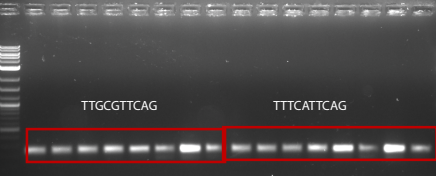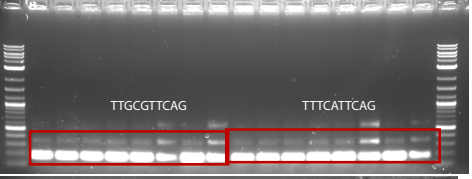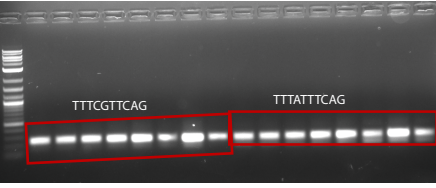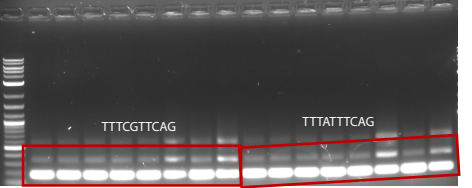

Extended Fig. 2q

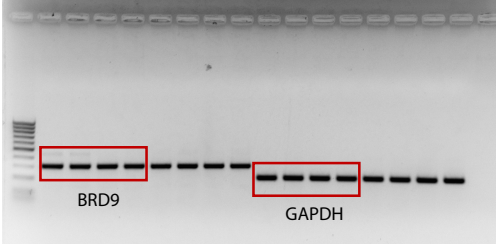

Extended Fig. 2l

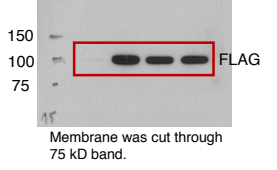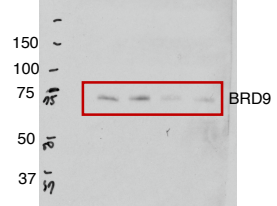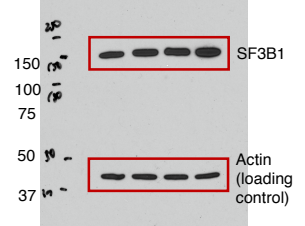

Membrane was cut between 75/50 kD band.

Extended Fig. 2r

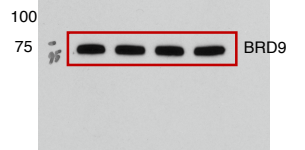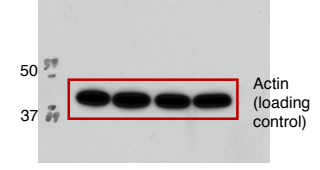

Membrane was cut between 75/50 kD band.

Extended Fig. 3b

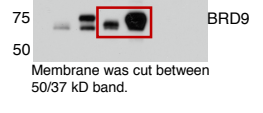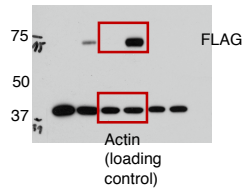

Membrane was cut between 75/50 kD band.

**Extended Fig. 3d**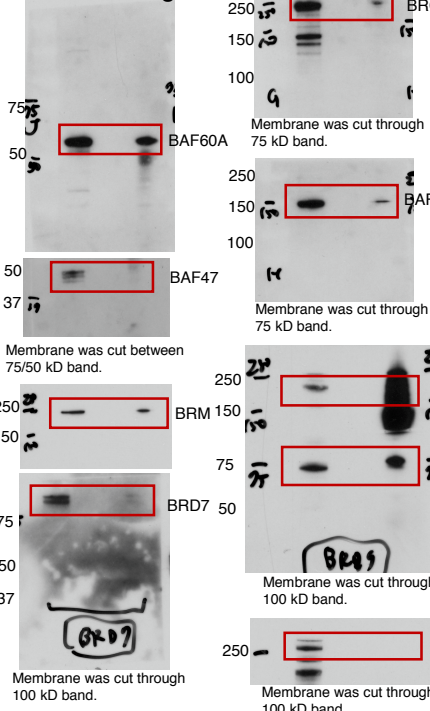**Extended Fig. 3e**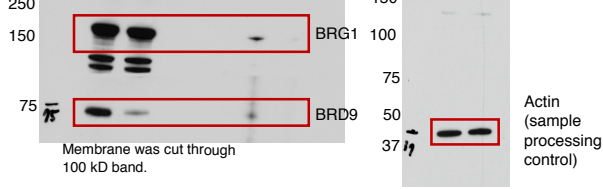**Extended Fig. 3f**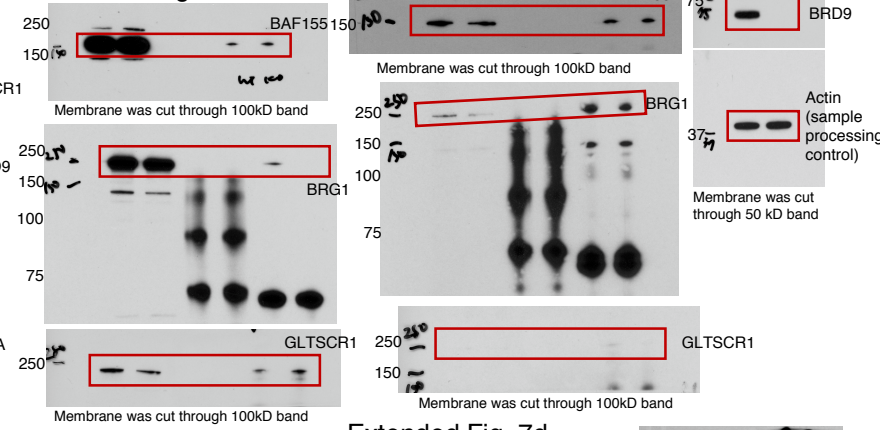**Extended Fig. 3h**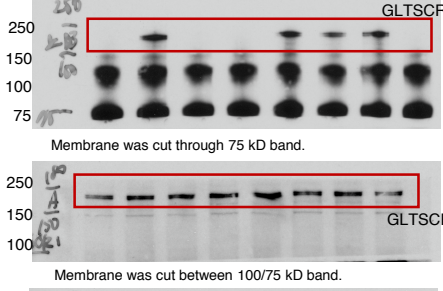**Extended Fig. 6b**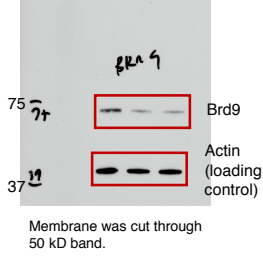**Extended Fig. 7d**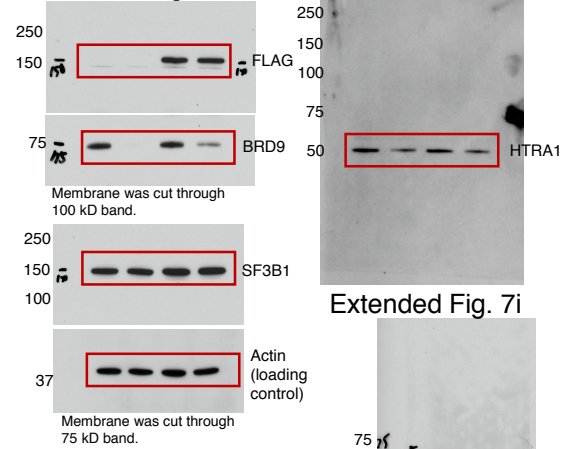**Extended Fig. 7e**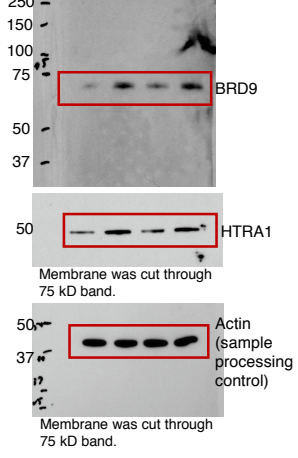**Extended Fig. 9e**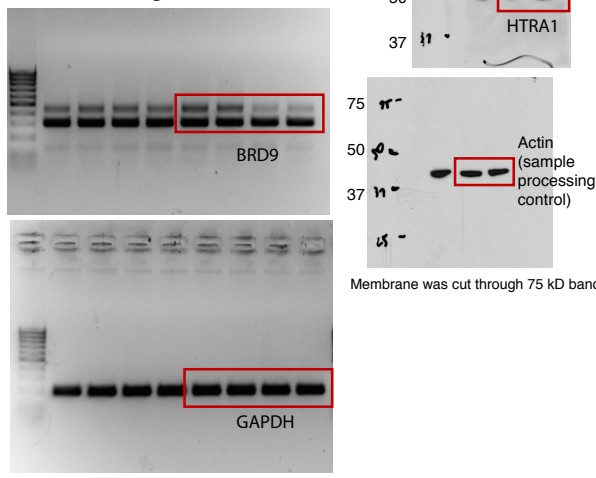**Extended Fig. 7g**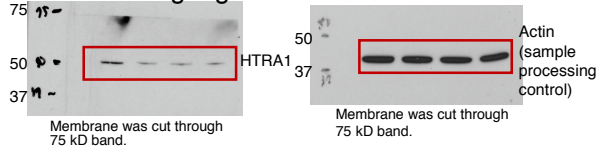

Supplement: NIHMS1538775-supplement-1.pdf [file NIHMS1538775-supplement-1.pdf]
